# Supplementary material for: Physiological Responses to Basic Tastes for Sensory Evaluation of Chocolate Using Biometric Techniques
Source: PubMed Central journal article supplement (PMC6679144; doi:10.3390/foods8070243), 2019-07-05
Supplement: foods-08-00243-s001.pdf [file foods-08-00243-s001.pdf]

**Supplementary Materials:**

**Table S1.** Factor loadings from the principal component analysis for descriptors used in Figure 1. The first two principal components (PC 1 and PC 2) are shown.

| <b>Attribute</b>   | <b>PC 1</b> | <b>PC 2</b> |
|--------------------|-------------|-------------|
| Liking             | -0.15       | -0.01       |
| Bitterness         | -0.13       | -0.36       |
| Saltiness          | 0.03        | -0.02       |
| Sourness           | -0.003      | 0.17        |
| Sweetness          | 0.05        | 0.32        |
| Umami              | 0.25        | -0.06       |
| Hardness           | -0.17       | -0.30       |
| Smoothness         | 0.09        | 0.38        |
| Persistence        | 0.21        | 0.23        |
| Happy              | 0.30        | -0.07       |
| Sad                | -0.24       | 0.03        |
| Angry              | 0.03        | -0.34       |
| Surprised          | -0.28       | 0.18        |
| Scared             | -0.23       | -0.12       |
| Disgusted          | 0.29        | -0.12       |
| Contempt           | 0.30        | -0.08       |
| Neutral            | 0.29        | -0.10       |
| Valence            | 0.30        | -0.05       |
| Arousal            | -0.29       | 0.13        |
| Y–Head Orientation | 0.01        | 0.13        |
| X–Head Orientation | 0.05        | 0.17        |
| Z–Head Orientation | -0.28       | -0.02       |
| HR                 | 0.09        | 0.23        |
| ST                 | -0.04       | 0.35        |
